# Supplementary material
Source: PubMed Central journal article supplement (PMC4076355)
Supplement: supp_113.112367_biolreprod.113.112367-1.pdf [file supp_113.112367_biolreprod.113.112367-1.pdf]

**SUPPLEMENTAL TABLE S1.** Average Fluid Intake and Weight Monitoring for Study Duration

|                         | <b>OVX</b>   | <b>OVX + BAPN</b> | <b>E2</b>    | <b>E2 + BAPN</b> |
|-------------------------|--------------|-------------------|--------------|------------------|
| Daily Water Intake (mL) | 108.9 ± 7.8  | 111.7 ± 13.0      | 112.2 ± 23.7 | 125.5 ± 14.8     |
| Baseline Weight (g)     | 503.3 ± 7.1  | 487.5 ± 9.4       | 495.0 ± 10.4 | 483.1 ± 7.5      |
| Weight 2 weeks (g)      | 559.1 ± 14.9 | 494.2 ± 15.2      | 501.3 ± 10.5 | 429.4 ± 23.5     |
| Weight 5 weeks (g)      | 612.7 ± 24.0 | 473.7 ± 16.5      | 574.7 ± 20.1 | 489.1 ± 11.5     |
